# Supplementary material for: Reliability and validity of a new HIV-specific questionnaire with adults living with HIV in Canada and Ireland: the HIV Disability Questionnaire (HDQ)
Source: PubMed Central journal article supplement (PMC4542093; doi:10.1186/s12955-015-0310-9), 2015-08-12
Supplement: 12955_2015_310_MOESM1_ESM.pdf [file 12955_2015_310_MOESM1_ESM.pdf]

## Additional File 1: Details of Construct Validity Analysis

| Construct Validity Analysis                                                                                                                                 | Pearson Correlation Coefficient (r)<br>(95% confidence interval) |                           |
|-------------------------------------------------------------------------------------------------------------------------------------------------------------|------------------------------------------------------------------|---------------------------|
|                                                                                                                                                             | Canada (n=139)                                                   | Ireland (n=96)            |
| <b>Convergent Construct Validity Hypotheses with the WHODAS 2.0<br/>(15 hypotheses)</b>                                                                     |                                                                  |                           |
| 1) Total WHODAS scores will strongly correlate ( $\geq 0.70$ ) with HDQ total scores                                                                        | <b>0.89 (0.85, 0.92)</b>                                         | <b>0.81 (0.72, 0.87)</b>  |
| 2) Cognition WHODAS summary scores will strongly correlate ( $\geq 0.70$ ) with the cognitive domain scores of the HDQ                                      | <b>0.74 (0.66, 0.81)</b>                                         | <b>0.73 (0.62, 0.81)</b>  |
| 3) Cognition WHODAS summary scores will moderately correlate ( $\geq 0.50$ ) with the mental-emotional domain scores of the HDQ                             | <b>0.61 (0.49, 0.70)</b>                                         | <b>0.63 (0.50, 0.74)</b>  |
| 4) Mobility WHODAS summary scores will strongly correlate ( $\geq 0.70$ ) with the difficulties with day-to-day domain scores of the HDQ                    | <b>0.81 (0.74, 0.86)</b>                                         | <b>0.75 (0.64, 0.83)</b>  |
| 5) Self-Care WHODAS summary scores will strongly correlate ( $\geq 0.70$ ) with the difficulties with day-to-day domain scores of the HDQ                   | <b>0.71 (0.62, 0.78)</b>                                         | 0.43 (0.25, 0.58)         |
| 6) Getting Along WHODAS summary scores will moderately correlate ( $\geq 0.50$ ) with the social inclusion domain scores of the HDQ                         | <b>0.73 (0.64, 0.80)</b>                                         | <b>0.63 (0.49, 0.74)</b>  |
| 7) Life-Activities (Household) WHODAS summary scores will strongly correlate ( $\geq 0.70$ ) with the difficulties with day-to-day domain scores of the HDQ | 0.66 (0.56, 0.74)                                                | 0.64 (0.51, 0.75)         |
| 8) Life-Activities (Work) WHODAS summary scores will moderately correlate ( $\geq 0.50$ ) with the social inclusion domain scores on the HDQ                | <b>0.67 (0.55, 0.76)</b>                                         | <b>0.51 (0.33, 0.65)</b>  |
| 9) Participation WHODAS summary scores will strongly correlate ( $\geq 0.70$ ) with the social inclusion domain scores on the HDQ                           | <b>0.80 (0.73, 0.85)</b>                                         | <b>0.79 (0.70, 0.86)</b>  |
| 10) Total WHODAS scores will strongly correlate ( $\geq 0.7$ ) with the physical symptoms and impairments domain scores of the HDQ                          | <b>0.73 (0.64, 0.80)</b>                                         | 0.58 (0.43, 0.70)         |
| 11) Total WHODAS scores will strongly correlate ( $\geq 0.7$ ) with the cognitive symptoms and impairments domain scores of the HDQ                         | <b>0.71 (0.62, 0.79)</b>                                         | 0.64 (0.50, 0.74)         |
| 12) Total WHODAS scores will strongly correlate ( $\geq 0.7$ ) with the mental-emotional symptoms and impairments domain scores of the HDQ                  | <b>0.73 (0.64, 0.80)</b>                                         | <b>0.70 (0.58, 0.79)^</b> |

|                                                                                                                                                               |                              |                             |
|---------------------------------------------------------------------------------------------------------------------------------------------------------------|------------------------------|-----------------------------|
| 13) Total WHODAS scores will strongly correlate ( $\geq 0.7$ ) with the difficulties with day-to-day activities domain scores of the HDQ.                     | <b>0.78 (0.70, 0.84)</b>     | 0.69 (0.57, 0.78)^          |
| 14) Total WHODAS scores will strongly correlate ( $\geq 0.7$ ) with the challenges to social inclusion domain scores of the HDQ                               | <b>0.80 (0.73, 0.85)</b>     | <b>0.76 (0.66, 0.83)</b>    |
| 15) Total WHODAS scores will moderately correlate ( $\geq 0.5$ ) with the uncertainty domain scores of the HDQ                                                | <b>0.69 (0.60, 0.77)^</b>    | <b>0.56 (0.41, 0.69)</b>    |
| <b>Total Number of Hypotheses Confirmed</b>                                                                                                                   | <b>13/15 (87%)</b>           | <b>10/15 (67%)</b>          |
| <b>Convergent Construct Validity Hypotheses with the SF-36 Questionnaire (18 hypotheses)</b>                                                                  | <b>Canada (n=139)</b>        | <b>Ireland (n=96)</b>       |
| 1) PCS Scores on the SF36 will moderately correlate ( $\geq 0.5$ ) with the physical symptoms and impairments domain scores of the HDQ                        | <b>-0.63 (-0.72, -0.52)</b>  | <b>-0.68 (-0.78, -0.56)</b> |
| 2) MCS Score on the SF36 will moderately correlate ( $\geq 0.5$ ) with the mental – emotional symptoms and impairments domain scores of the HDQ               | -0.73 (-0.80, -0.64)         | -0.70 (-0.79, -0.58)^       |
| 3) Bodily Pain Score on the SF36 will strongly correlate ( $\geq 0.7$ ) with the physical symptoms and impairments domain scores of the HDQ                   | <b>-0.70 (-0.78, -0.60)^</b> | -0.67 (-0.77, -0.54)        |
| 4) Vitality Summary Score on the SF36 will strongly correlate ( $\geq 0.7$ ) with the physical symptoms and impairments domain scores of the HDQ              | -0.61 (-0.71, -0.50)         | -0.63 (-0.74, -0.49)        |
| 5) Social Function Summary Score on the SF36 will moderately correlate ( $> 0.5$ ) with the physical symptoms and impairments domain scores of the HDQ        | <b>-0.57 (-0.67, -0.44)</b>  | <b>-0.56 (-0.68, -0.41)</b> |
| 6) Physical Function score on the SF36 will moderately correlate ( $\geq 0.5$ ) with the difficulties with day-to-day activities domain scores of the HDQ     | <b>-0.67 (-0.75, -0.56)</b>  | <b>-0.63 (-0.74, -0.49)</b> |
| 7) Role Physical Summary Score on the SF36 will moderately correlate ( $\geq 0.5$ ) with the difficulties with day-to-day activities domain scores of the HDQ | <b>-0.60 (-0.70, -0.49)</b>  | <b>-0.63 (-0.74, -0.49)</b> |
| 8) Role Physical Summary Score will moderately correlate ( $\geq 0.5$ ) with the social inclusion domain scores of the HDQ                                    | <b>-0.60 (-0.70, -0.48)</b>  | <b>-0.56 (-0.69, -0.41)</b> |
| 9) Role Physical Summary Score will moderately correlate ( $\geq 0.5$ ) with the physical domain scores of the HDQ                                            | <b>-0.62 (-0.71, -0.50)</b>  | <b>-0.56 (-0.68, -0.40)</b> |

|                                                                                                                                    |                             |                               |
|------------------------------------------------------------------------------------------------------------------------------------|-----------------------------|-------------------------------|
| 10) Role Emotional Summary Score will moderately correlate ( $\geq 0.5$ ) with the mental-emotional domain scores of the HDQ       | <b>-0.63 (-0.72, -0.52)</b> | -0.48 (-0.62, -0.31)          |
| 11) Role Emotional Summary Score will moderately correlate ( $\geq 0.5$ ) with the social domain scores of the HDQ                 | <b>-0.61 (-0.71, -0.50)</b> | <b>-0.54 (-0.66, -0.38)</b>   |
| 12) Mental Health Summary Score will strongly correlated ( $\geq 0.7$ ) with the mental-emotional domain scores of the HDQ         | <b>-0.76 (-0.82, -0.68)</b> | -0.68 (-0.78, -0.56)          |
| 13) Social Function Summary Score will moderately correlate ( $\geq 0.5$ ) with the mental-emotional domain scores of the HDQ      | <b>-0.64 (-0.72, -0.52)</b> | <b>-0.67 (-0.77, -0.54)</b>   |
| 14) Social Function Summary Score will moderately correlate ( $\geq 0.5$ ) with the social domain scores of the HDQ                | <b>-0.60 (-0.70, -0.48)</b> | <b>-0.65 (-0.75, -0.52)</b>   |
| 15) Social Function Summary Score will moderately correlate ( $\geq 0.5$ ) with the physical domain scores of the HDQ              | <b>-0.57 (-0.67, -0.44)</b> | <b>-0.56 (-0.68, -0.41)</b>   |
| 16) Mental Component Summary (MCS) Score will moderately correlate ( $\geq 0.5$ ) to with the uncertainty domain scores of the HDQ | -0.73 (-0.80, -0.64)~       | -0.47 (-0.61, -0.30)          |
| 17) Physical Component Summary (PCS) Score will weakly correlate ( $\geq 0.3$ ) with the uncertainty domain scores of the HDQ      | <b>-0.31 (-0.46, -0.15)</b> | <b>-0.34 (-0.50, -0.15)</b>   |
| 18) Mental Component Summary (MCS) Score will moderately correlate ( $\geq 0.5$ ) with the cognitive domain scores of the HDQ      | -0.47 (-0.59, -0.32)        | <b>-0.57 (-0.69, -0.42)</b>   |
| <b>Total Number of Hypotheses Confirmed</b>                                                                                        | <b>14/18 (78%)</b>          | <b>12/18 (67%)</b>            |
| <b>Divergent Construct Validity with MOS-Social Support Scale (7 hypotheses)</b>                                                   | <b>Canada (n=139)</b>       | <b>Ireland (n=96)</b>         |
| 1) Scores on the Social Support Scale will weakly correlate ( $\geq 0.3$ ) with the physical domain scores of the HDQ              | <b>-0.34 (-0.48, -0.18)</b> | -0.12 (-0.32, 0.08)<br>p=0.22 |
| 2) Scores on the Social Support Scale will weakly correlate ( $\geq 0.3$ ) with the cognitive domain scores of the HDQ             | -0.29 (-0.44, -0.13)^       | -0.11 (-0.3, 0.09)<br>p=0.29  |
| 3) Scores on the Social Support Scale will moderately correlate ( $\geq 0.5$ ) with the mental-emotional domain scores of the HDQ  | <b>-0.52 (-0.63, -0.38)</b> | -0.33 (-0.50, -0.14)          |

|                                                                                                                   |                                                                  |                               |
|-------------------------------------------------------------------------------------------------------------------|------------------------------------------------------------------|-------------------------------|
| 4) Scores on the Social Support Scale will weakly correlate ( $\geq 0.3$ ) with the UNCERTAINTY domain of the HDQ | <b>-0.48 (-0.60, -0.33)</b>                                      | -0.17 (-0.36, 0.03)<br>p=0.10 |
| 5) Scores on the Social Support Scale will weakly correlate ( $\geq 0.3$ ) with the DAY domain of the HDQ         | -0.26 (-0.41, -0.10)                                             | -0.24 (-0.42, -0.04)          |
| 6) Scores on the Social Support Scale will moderately correlate ( $\geq 0.5$ ) with the SOCIAL domain of the HDQ  | <b>-0.56 (-0.67, -0.43)</b>                                      | -0.34 (-0.51, -0.15)          |
| 7) Scores on the Social Support Scale will weakly correlate ( $\geq 0.3$ ) with the HDQ TOTAL Score               | <b>-0.49 (-0.62, -0.36)^</b>                                     | -0.27 (-0.45, -0.08)          |
| <b>Total Number of Divergent Construct Validity Hypotheses Confirmed</b>                                          | <b>5/7 (71%)</b>                                                 | <b>0/7 (0%)</b>               |
| <b>Total Number of Correlation Hypotheses Confirmed</b>                                                           | <b>32/40 (80%)</b>                                               | <b>22/40 (55%)</b>            |
| <b>Known Groups Construct Validity (2 hypotheses)</b>                                                             |                                                                  |                               |
| 1) Older participants with more comorbidity will have higher total HDQ presence scores                            | <b>Confirmed</b> (Canada: 70 versus Ireland: 43)<br>(p = 0.0001) |                               |
| 2) Older participants with more comorbidity will have higher total HDQ severity scores                            | <b>Confirmed</b> (Canada: 29 versus Ireland: 17)<br>(p = 0.0001) |                               |
| <b>Total Number of Known Group Hypotheses Confirmed</b>                                                           | <b>2/2 (100%)</b>                                                |                               |

LEGEND

All correlation coefficients were statistically significant ( $p < 0.0001$ ) unless otherwise stated.

Bolded coefficients indicate acceptance of (or confirmed) hypotheses.

^Indicate seven borderline correlation coefficients values of weak ( $|0.3|$ ), moderate ( $|0.5|$ ) and strong ( $|0.7|$ ) correlations

~Strongly correlated ( $|\geq 0.70|$ ) rather than moderately correlated ( $|\geq 0.50|$ )
